# Supplementary material for: Plasmonic 3-D wrinkled polymeric shrink film-based SERS substrates for pesticide detection on real-world surfaces
Source: Royal Society of Chemistry journal article supplement (doi:10.1039/d2an01657e), 2022-11-25
Supplement: d2an01657e1.pdf [file d2an01657e1.pdf]

## Electronic Supplementary Information

Plasmonic 3-D Wrinkled Polymeric Shrink Film-based SERS Substrate for  
Pesticide Detection on Real-World Surfaces

Keshav Bhardwaj and Amit Jaiswal\*

School of Biosciences and Bioengineering, Indian Institute of Technology Mandi, Kamand,  
Mandi, Himachal Pradesh, India, Pincode: 175075

\* Corresponding author email: [j.amit@iitmandi.ac.in](mailto:j.amit@iitmandi.ac.in)

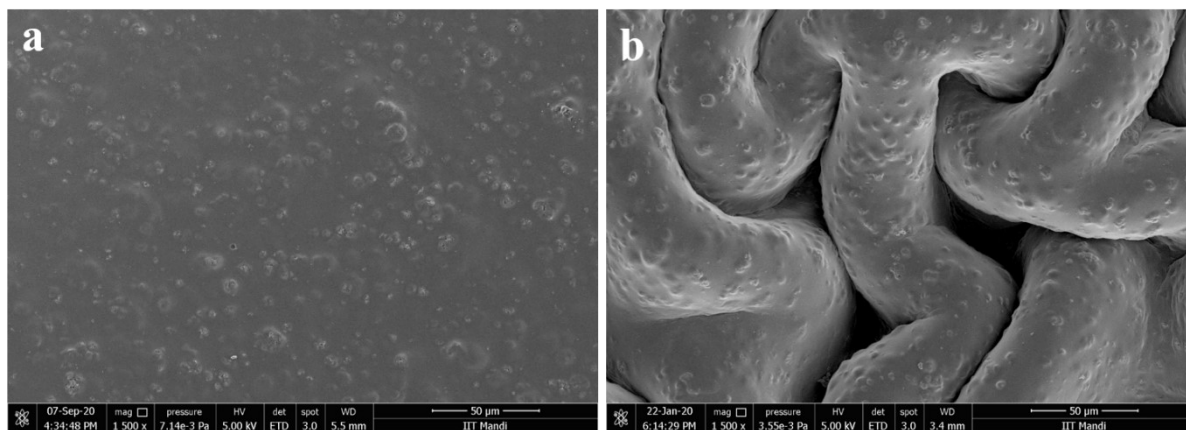

**Figure S1:** Represents the scanning electron micrographs of template shrink film used for fabrication of shrink film SERS substrate; a) bare shrink film (without heat treatment) b) bare shrink film (after heat treatment) Scale bar; 50µm.

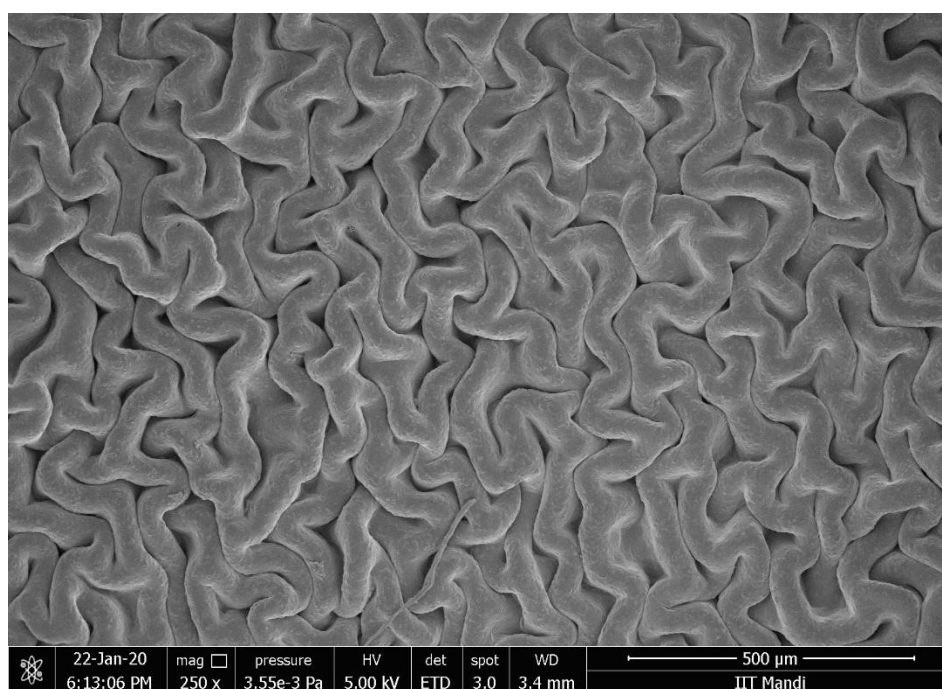

**Figure S2:** Represents the scanning electron micrographs of bare shrink film (after heat treatment) Scale bar; 500µm.

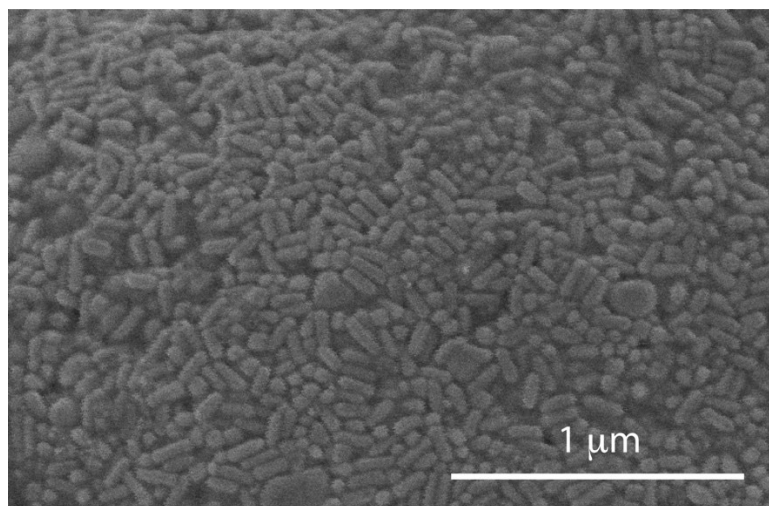

**Figure S3:** Shows SEM image at higher magnification for the Au@Ag nanorod deposited substrate.

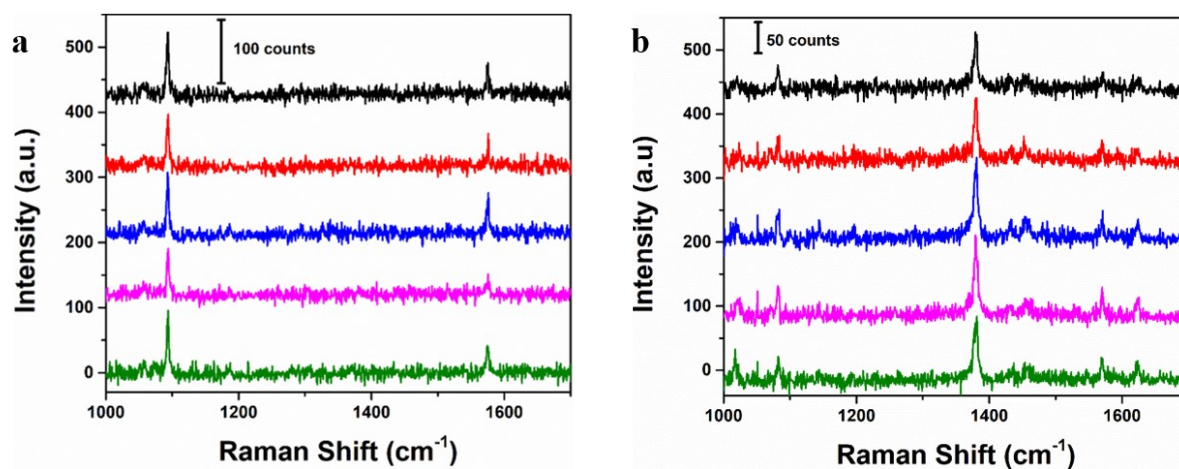

**Figure S4:** Raman spectra of bulk analyte a) 1,4-BDT, and b) 2-NT (at 5 different spots)

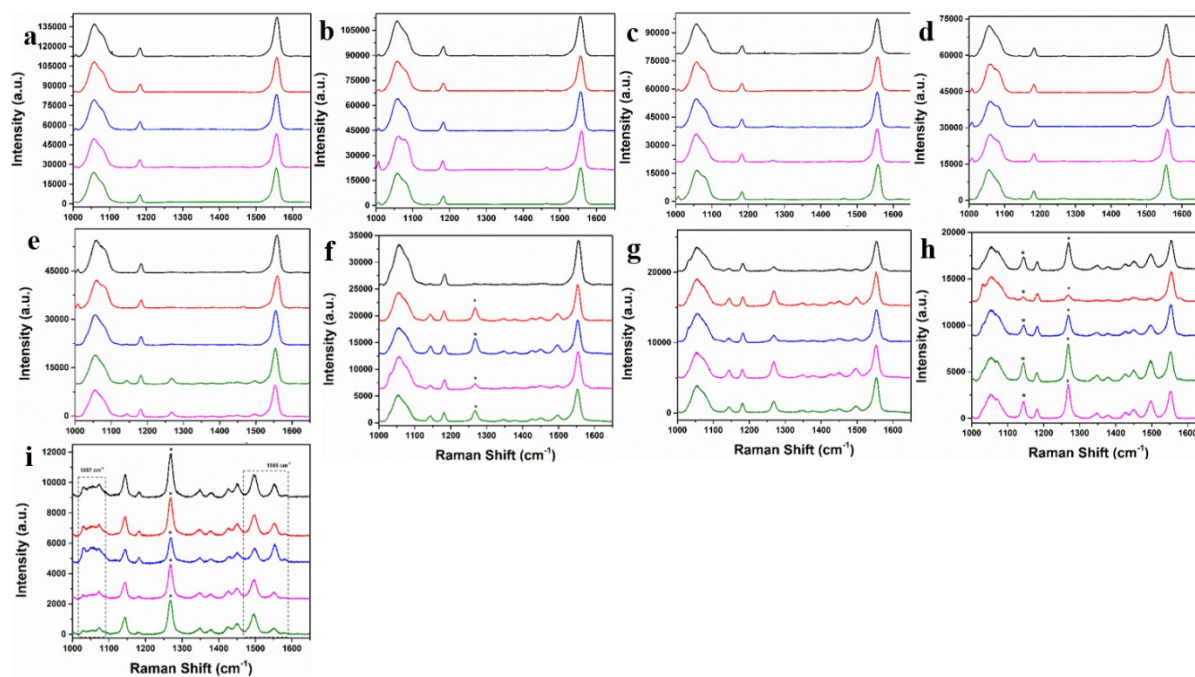

**Figure S5:** SERS spectra of 1,4-BDT at 5-different spots on substrate for different concentrations ranging from a)  $10^{-5}\text{M}$ , b)  $10^{-6}\text{M}$ , c)  $10^{-7}\text{M}$ , d)  $10^{-8}\text{M}$ , e)  $10^{-9}\text{M}$ , f)  $10^{-10}\text{M}$ , g)  $10^{-11}\text{M}$ , h)  $10^{-12}\text{M}$ , and i)  $10^{-13}\text{M}$  respectively.

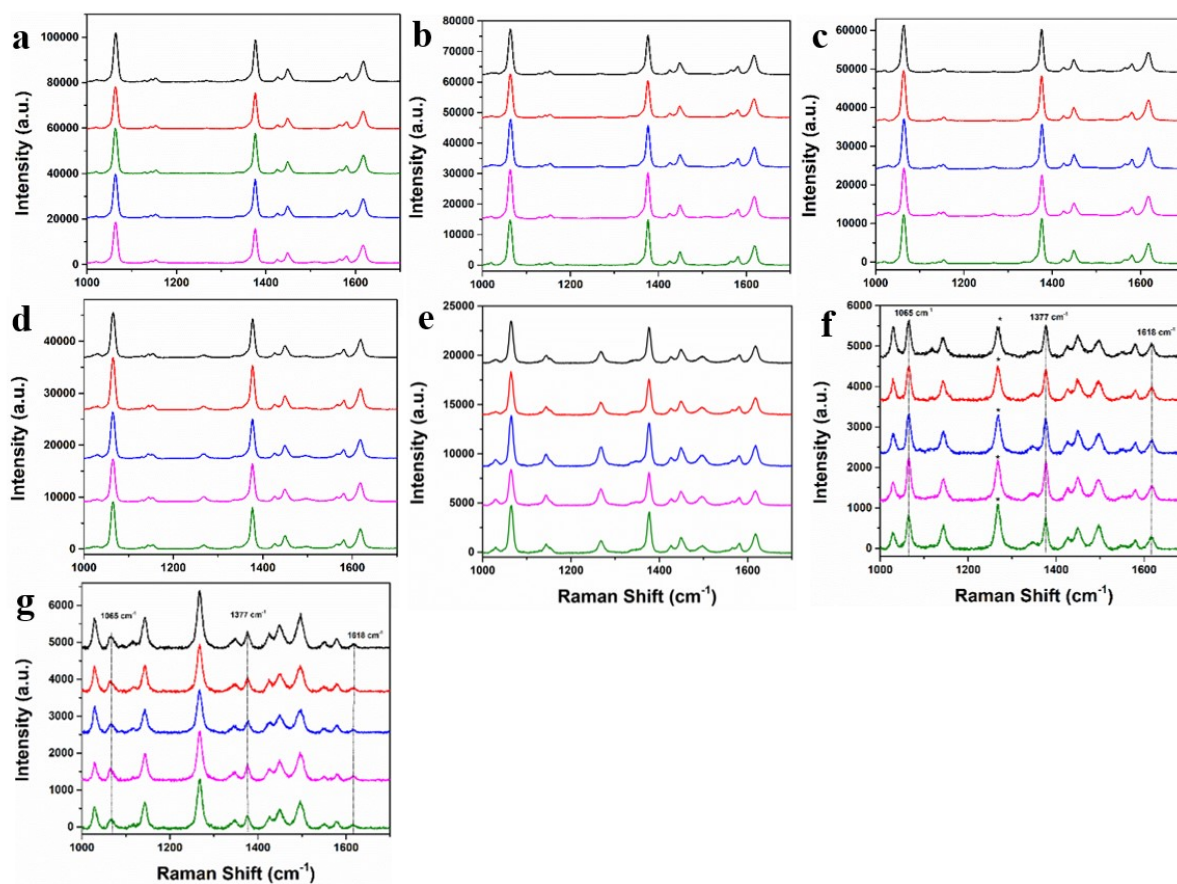

**Figure S6:** SERS spectra of 2-NT at 5-different spots on substrate for different concentrations ranging from a)  $10^{-5}\text{M}$ , b)  $10^{-6}\text{M}$ , c)  $10^{-7}\text{M}$ , d)  $10^{-8}\text{M}$ , e)  $10^{-9}\text{M}$ , f)  $10^{-10}\text{M}$  and g)  $10^{-11}\text{M}$  respectively.

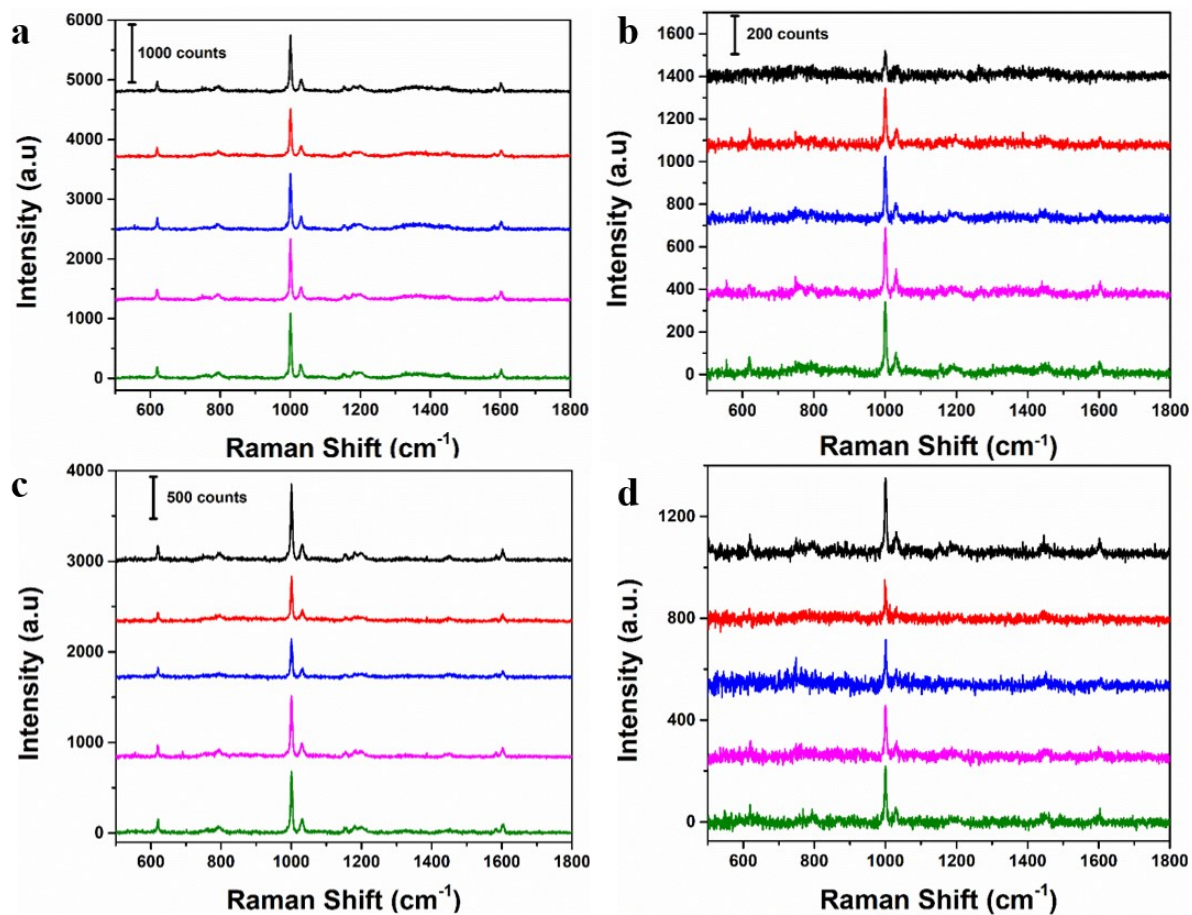

**Figure S7:** SERS spectra on shrink films a) bare shrink film before heat treatment, b) Au bead@Ag nanorod deposited shrink film before heat treatment, c) bare shrink film after heat treatment, d) Au bead@Ag nanorod deposited shrink film after heat treatment.

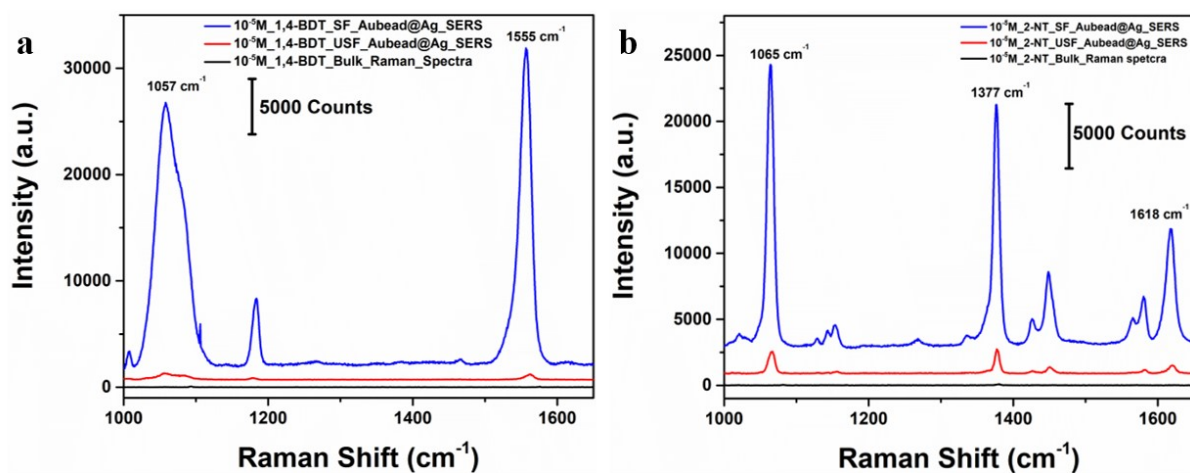

**Figure S8:** Bulk and SERS spectra of 10  $\mu\text{M}$  ( $10^{-5}\text{M}$ ) analyte; a) 1,4-BDT (black = bulk Raman, red = on Au bead@Ag unshrink film SERS, blue = on Au bead@Ag shrink film SERS) and similarly, b) 2-NT (black = bulk Raman, red = on Au bead@Ag unshrink film SERS, blue = on Au bead@Ag shrink film SERS).

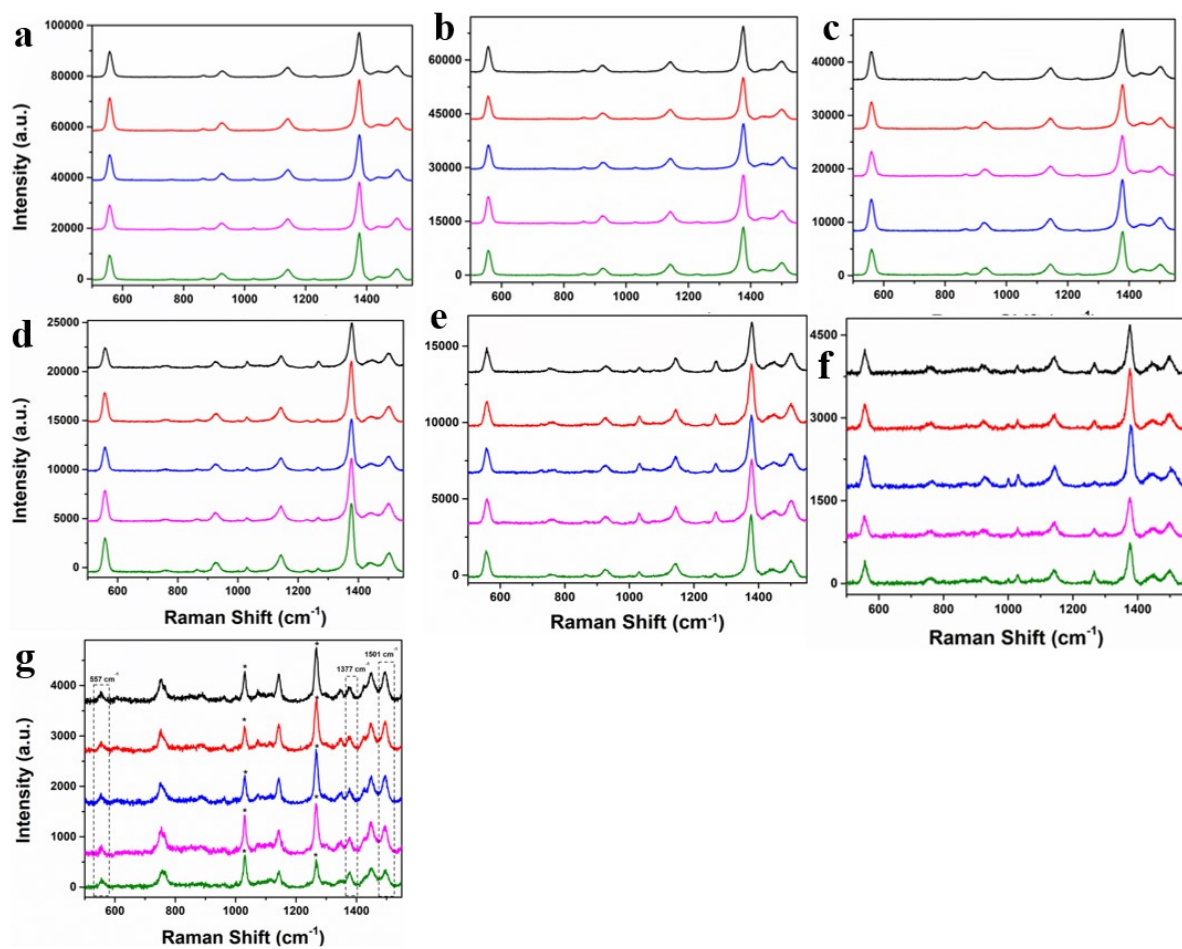

**Figure S9:** SERS spectra of thiram at 5-different spots on the substrate for different concentrations ranging from a) 10<sup>-5</sup>M, b) 10<sup>-7</sup>M, c) 10<sup>-8</sup>M, d) 10<sup>-9</sup>M, e) 10<sup>-10</sup>M, f) 10<sup>-11</sup>M, g) 10<sup>-13</sup>M and h) respectively.



## Enhancement Factor (EF) Calculation

The analytical enhancement factor was calculated using the following equation:

$$\text{Enhancement Factor (EF)} = \frac{I_{SERS} / N_{SERS}}{I_{BULK} / N_{BULK}}$$

Where,  $I_{SERS}$  and  $I_{BULK}$  are the Raman intensities of same band of analytes used for the SERS and bulk spectra.  $N_{SERS}$  is the amount of analyte molecules present on the shrink film substrate and  $N_{BULK}$  is the amount of bulk analyte molecule.
